# 1                    **Interaction network of SARS-CoV-2 with host receptome** 2                    **through spike protein**

3                    Yunqing Gu <sup>1,8</sup>, Jun Cao <sup>1,2,8</sup>, Xinyu Zhang <sup>1,8</sup>, Hai Gao <sup>1,3,8</sup>, Yuyan Wang <sup>4,8</sup>, Jia Wang  
4                    <sup>5,8</sup>, Jinlan Zhang <sup>1</sup>, Guanghui Shen <sup>2</sup>, Xiaoyi Jiang <sup>1</sup>, Jie Yang <sup>1</sup>, Xichen Zheng <sup>1,2</sup>,  
5                    Jianqing Xu <sup>1,6</sup>, Cheng Cheng Zhang <sup>7</sup>, Fei Lan <sup>1</sup>, Di Qu <sup>4</sup>, Yun Zhao <sup>5</sup>, Guoliang Xu <sup>1,5</sup>,  
6                    Youhua Xie <sup>1,4,\*</sup>, Min Luo <sup>1,2,\*</sup>, Zhigang Lu <sup>1,\*</sup>

7                    <sup>1</sup> The Fifth People's Hospital of Shanghai, the Shanghai Key Laboratory of Medical  
8                    Epigenetics, the International Co-laboratory of Medical Epigenetics and Metabolism,  
9                    Ministry of Science and Technology, Institutes of Biomedical Sciences, Fudan University,  
10                    Shanghai 200032, China

11                    <sup>2</sup> Institute of Pediatrics of Children's Hospital of Fudan University, Shanghai 201102,  
12                    China

13                    <sup>3</sup> Zhongshan-Xuhui Hospital, Fudan University, Shanghai 200020, China

14                    <sup>4</sup> Key Laboratory of Medical Molecular Virology (MOE/MOH), School of Basic Medical  
15                    Sciences, Shanghai Medical College, Fudan University, Shanghai 200032, China

16                    <sup>5</sup> State Key Laboratory of Molecular Biology, CAS Center for Excellence in Molecular  
17                    Cell Science, Institute of Biochemistry and Cell Biology, Shanghai Institutes for  
18                    Biological Sciences, Chinese Academy of Sciences, Shanghai 200031, China

19                    <sup>6</sup> Shanghai Public Health Clinical Center, Fudan University, Shanghai 200433, China

20                    <sup>7</sup> Department of Physiology, University of Texas Southwestern Medical Center, Dallas,  
21                    TX 75390, USA

22                    <sup>8</sup> These authors contributed equally to this work.

23                    \* Corresponding author. Email: [zhiganglu@fudan.edu.cn](mailto:zhiganglu@fudan.edu.cn) (Z.L.); [luo\\_min@fudan.edu.cn](mailto:luo_min@fudan.edu.cn)  
24                    (M.L.); [yhxie@fudan.edu.cn](mailto:yhxie@fudan.edu.cn) (Y.X.).

25 **SUMMARY**

26 Host cellular receptors are key determinants of virus tropism and pathogenesis. Virus  
27 utilizes multiple receptors for attachment, entry, or specific host responses. However,  
28 other than ACE2, little is known about SARS-CoV-2 receptors. Furthermore, ACE2  
29 cannot easily interpret the multi-organ tropisms of SARS-CoV-2 nor the clinical  
30 differences between SARS-CoV-2 and SARS-CoV. To identify host cell receptors  
31 involved in SARS-CoV-2 interactions, we performed genomic receptor profiling to  
32 screen almost all human membrane proteins, with SARS-CoV-2 capsid spike (S) protein  
33 as the target. Twelve receptors were identified, including ACE2. Most receptors bind at  
34 least two domains on S protein, the receptor-binding-domain (RBD) and the  
35 N-terminal-domain (NTD), suggesting both are critical for virus-host interaction. Ectopic  
36 expression of ASGR1 or KREMEN1 is sufficient to enable entry of SARS-CoV-2, but not  
37 SARS-CoV and MERS-CoV. Analyzing single-cell transcriptome profiles from  
38 COVID-19 patients revealed that virus susceptibility in airway epithelial ciliated and  
39 secretory cells and immune macrophages highly correlates with expression of ACE2,  
40 KREMEN1 and ASGR1 respectively, and ACE2/ASGR1/KREMEN1 (ASK) together  
41 displayed a much better correlation than any individual receptor. Based on modeling of  
42 systemic SARS-CoV-2 host interactions through S receptors, we revealed ASK  
43 correlation with SARS-CoV-2 multi-organ tropism and provided potential explanations  
44 for various COVID-19 symptoms. Our study identified a panel of SARS-CoV-2 receptors  
45 with diverse binding properties, biological functions, and clinical correlations or  
46 implications, including ASGR1 and KREMEN1 as the alternative entry receptors,  
47 providing insights into critical interactions of SARS-CoV-2 with host, as well as a useful  
48 resource and potential drug targets for COVID-19 investigation.

49

50 **MAIN TEXT**

51 The global outbreak of COVID-19 caused by SARS-CoV-2 severely threatens human  
52 health <sup>1,2</sup>. SARS-CoV-2 is a member of the beta-coronavirus genus, closely related to  
53 severe acute respiratory syndrome coronavirus (SARS-CoV), and both viruses use ACE2  
54 as an entry receptor <sup>3-5</sup>. SARS-CoV-2 is more than a respiratory virus, with multi-organ  
55 tropisms and causing complicated symptoms <sup>2,6-8</sup>. Host cellular receptors play key roles in  
56 determining virus tropism and pathogenesis. Viruses bind to multiple host receptors for  
57 viral attachment, cell entry, and diverse specific host responses, including inducing  
58 cytokine secretion, stimulation of the immune response, or alteration of virus budding  
59 and release <sup>9-12</sup>. However, apart from ACE2, little is known about SARS-CoV-2 receptors.  
60 Additionally, ACE2 cannot fully interpret SARS-CoV-2 tropism. The virus was detected  
61 in tissues with few ACE2 expression, such as liver, brain and blood, and even in lung,  
62 only a small subset of cells express ACE2 <sup>13,14</sup>. The primary infection sites and clinical  
63 manifestations of SARS-CoV-2 and SARS-CoV also differ much, suggesting the  
64 involvement of other receptor(s) in SARS-CoV-2 host interaction <sup>1,2,15-18</sup>. Therefore, a  
65 comprehensive understanding of SARS-CoV-2 cellular receptors is required.

66 Identification of receptors from virus-susceptible cells is limited to membrane proteins  
67 on specific cell types. We previously investigated ligand-receptor interactions using a cell  
68 based method, in which receptor-expressing cells were incubated with a tagged ligand  
69 and then an anti-tag for labelling and detection <sup>19,20</sup>. It closely reassembles  
70 ligand-receptor interaction that occurring under physiological condition, and is usually  
71 used to confirm specific interactions. Based on this method, we developed a  
72 high-throughput receptor profiling system covering nearly all human membrane proteins,  
73 and used it to identify SARS-CoV-2 cellular receptors. Given SARS-CoV-2 S protein is  
74 the major receptor binding protein on the virus capsid, we performed profiling using S  
75 protein as the target. 5054 human membrane protein-encoding genes (91.6% of predicted

76 human membrane proteins) were expressed individually on human 293e cells, and their  
77 binding with the extracellular domain of S protein (S-ECD) was measured (Fig. 1a).  
78 Twelve membrane proteins were identified that specifically interact with the S-ECD (Fig.  
79 1b, c and Extended Data Fig.1), including the previously reported ACE2<sup>4,5</sup> and  
80 SARS-CoV-specific CLEC4M (L-SIGN)<sup>21</sup>.

81 The dissociation constants (Kd) of these interactions ranged from 12.4 - 525.4 nM  
82 (Table.1 and Extended Data Fig.2). ACE2 binds to S-ECD with a Kd of 12.4 nM,  
83 comparable to the previously reported Kd<sup>22</sup>, and ACE2, CD207, CLEC4M, and  
84 KREMEN1 are all high-affinity receptors of the S protein, with comparable Kds. Binding  
85 domains on S protein were also examined, including the receptor binding domain (RBD),  
86 N-terminal domain (NTD) and S2 domain. The RBD and NTD are the major binding  
87 sites of S receptors. ACE2 only binds to the RBD, while CD207 and ERGIC3 bind  
88 exclusively with the NTD. The other receptors can bind to at least two domains, with  
89 CLEC4M, KREMEN1, and LILRB2 binding to all three domains, showing highest  
90 binding with NTD, RBD, and RBD, respectively (Table.1 and Extended Data Fig.3).  
91 Overall, these receptors showed diverse binding patterns, and they have a diverse range  
92 of biological functions and signaling properties (Extended Data Fig.4).

93 To determine whether these receptors can mediate virus entry independent of ACE-2,  
94 ACE2 was further knocked out in the HEK293T cell line (Extended Data Fig.5), which is  
95 low-sensitive to SARS-CoV-2 and SARS-CoV<sup>3,4,16</sup>. We ectopically expressed the  
96 receptors in ACE2-KO 293T cells individually, and infected cells separately with  
97 pseudotyped SARS-CoV-2, SARS-CoV or MERS-CoV. KREMEN1-expressing cells  
98 showed clear evidence of SARS-CoV-2 infection, as did ASGR1, although to a lesser  
99 extent (Fig. 2a). Both receptors are specific to SARS-CoV-2, whereas ACE2 mediates the  
100 entry of both SARS-CoV-2 and SARS-CoV (Fig. 2a). ASGR1- and KREMEN1-  
101 dependent virus entry was confirmed with patient-derived SARS-CoV-2, with ASGR1

102 promoting higher levels of infection (Fig. 2b, c).

103 Direct interaction of SARS-CoV-2 S protein with KREMEN1 and ASGR1 was  
104 confirmed by co-immuno-precipitation (Co-IP) (Fig. 2d). KREMEN1 and ASGR1 bind to  
105 S-ECD with Kds of 19.3 nM and 94.8 nM, respectively, the former Kd being comparable  
106 to that of ACE2 (12.4 nM). ACE2 has the highest maximum binding capacity for S-ECD,  
107 being ~3- and ~10-fold that of ASGR1 and KREMEN1, respectively (Fig. 2e), consistent  
108 with the SARS-CoV-2 sensitivities of cells expressing these receptors (Fig. 2a-c). Few  
109 binding of SARS-CoV S protein was observed with ASGR1 and KREMEN1 (Fig. 2e and  
110 Extended Data Fig.6), consistent with KREMEN1 and ASGR1 not mediating SARS-CoV  
111 infections (Fig. 2a). ACE2 binds exclusively to the RBD, KREMEN1 binds to all three  
112 domains of S-ECD, and with highest binding to the RBD, and ASGR1 binds to both the  
113 NTD and the RBD, the latter also with higher binding (Table. 1 and Extended Data Fig.3).  
114 Evidence indicates that the NTD is involved in entry coronavirus including SARS-CoV-2  
115 <sup>23-26</sup>, suggesting the potential importance of ASGR1 and KREMEN1 in SARS-CoV-2  
116 infection. KREMEN1 is a high-affinity DKK1 receptor that antagonizes canonical WNT  
117 signaling <sup>27</sup>, and is also the entry receptor for a major group of Enteroviruses <sup>28</sup>. ASGR1  
118 is an endocytic recycling receptor that plays a critical role in serum glycoprotein  
119 homeostasis <sup>29</sup> and has been reported to facilitate entry of Hepatitis C virus <sup>30</sup>. Thus,  
120 ASGR1 and KREMEN1 directly mediate SARS-CoV-2 entry, together with ACE2, we  
121 refer to them as the ASK (ACE2/ASGR1/KREMEN1) entry receptors.

122 To investigate the clinical relevance of these entry receptors for SARS-CoV-2  
123 susceptibility, we analyzed a recently published single cell sequencing (scRNA-seq)  
124 profile of the upper respiratory tract of 19 patients with COVID-19 <sup>31</sup>. The dataset was  
125 derived from nasopharyngeal/pharyngeal swabs, and contains both the gene expression  
126 and virus infection status for individual cells, which are composed mainly of epithelial  
127 and immune populations. ACE2 is principally expressed in epithelial populations, as

128 previously reported <sup>31</sup>, whereas ASGR1 and KREMEN1 are enriched in both epithelial  
129 and immune populations (Fig. 3a). The majority of ASK<sup>+</sup> cells express only one entry  
130 receptor (88.5%), and KREMEN1-expressing cells are the most abundant, being ~5-fold  
131 more numerous than either ACE2- or ASGR1-expressing cells (Fig. 3b and Extended  
132 Data Fig.7a). SARS-CoV-2 is mainly observed in epithelial ciliated and secretory cells  
133 and immune non-resident macrophages (nrMa), which are also the major populations that  
134 express ASK receptors (Fig. 3b, c). Within SARS-CoV-2 positive cells (V<sup>+</sup> cells), only  
135 10.3% expressed ACE-2, suggesting other receptors will facilitate entry (Fig. 3c and  
136 Extended Data Fig.8).

137 We determined the correlation of the KREMEN1, ASGR1, and ACE2 entry receptors  
138 with SARS-CoV-2 susceptibility. In total cells, the receptor-positive cell percentage was  
139 significantly higher in V<sup>+</sup> cells than in V<sup>-</sup> cells for all three receptors (Fig. 3d). In  
140 epithelial populations, both ACE2 and KREMEN1 were substantially enriched in V<sup>+</sup> cells,  
141 while in immune populations, only ASGR1 correlated with virus susceptibility, especially  
142 in macrophages (Fig. 3d and Extended Data Fig.7b). The epithelial ciliated and secretory  
143 cells are known target cells of SARS-CoV-2 <sup>14,31</sup>. ACE2 displayed a more significant  
144 correlation with the virus susceptibility of ciliated cells when compared with KREMEN1,  
145 which was the only entry receptor that highly correlates virus susceptibility in secretory  
146 cells. Either in all cells or cell subpopulations, the ASK combination was usually more  
147 highly correlated with virus infection than individual receptors (Fig. 3d and Extended  
148 Data Fig.7b).

149 SARS-CoV-2 displays multi-organ tropism in COVID-19 patients <sup>6,12,13,17,32</sup>. However,  
150 in virus-positive tissues, such as brain, liver, peripheral blood (PB) and even lung, ACE2  
151 expression is few or only detected in a small subset of cells <sup>13,14,18</sup> (Extended Data Fig.9a,  
152 b), suggesting that ACE2 alone is difficult to explain the multi-organ tropisms of  
153 SARS-CoV-2. To determine whether ASK expression can predict tissue tropism better

154 than ACE2 expression, we modeled a systemic host-SARS-CoV-2 interaction based on  
155 the expression of ASK entry receptors across human tissues (Fig. 4a). For a better  
156 comparison of different receptors from aspect of viral binding, the mRNA level was  
157 normalized with the S binding affinity of each receptor. ACE2 and ASGR1 are highly  
158 expressed in the gastrointestinal and liver, respectively, while KREMEN1 is broadly  
159 expressed throughout the body. In virus-positive tissues, we found least one of the entry  
160 receptors is expressed (Extended Data Fig.9b and Fig. 4a). When ASK receptor  
161 expression levels were correlated with virus infection rates in different tissues reported in  
162 a recent biopsy study <sup>6</sup>, the three receptors together correlated much better with virus  
163 susceptibility than any individual receptor (Fig. 4b). These results suggest that ASK  
164 expression underlies the multi-organ tropism of SARS-CoV-2, and is therefore can  
165 potentially predict viral tropism.

166 Despite functioning in viral entry, virus-host receptor interactions could also induce  
167 cytokine secretion, apoptosis, and stimulation of the immune response, or alter virus  
168 budding and release <sup>9-12</sup>. To gain insight into SARS-CoV-2 pathogenesis, we also  
169 modeled the host-SARS-CoV-2 interaction based on the tissue distribution of all the  
170 other receptors identified, which were classified according to their functions in immune  
171 regulation, the Wnt pathway, and protein trafficking. The interaction map revealed that  
172 expression of immune receptors is prominent in immune organs, as well as respiratory  
173 organs, and the liver (Extended Data Fig.9 and Fig. 4a), consistent with the respiratory  
174 manifestation and frequent liver injury in COVID-19 patients <sup>1,2,32,33</sup>. Given that CD207,  
175 CLEC4M, LILRB2 and SIGLEC9 all are mainly expressed in myeloid cells (Extended  
176 Data Fig.10) and that COVID-19 is associated with hyperactivation of myeloid  
177 populations <sup>12,34,35</sup>, it is possible that these receptors may drive monocyte and macrophage  
178 activation in COVID-19 and contribute to disease pathophysiology.

179 ERGIC3, LMAN2, and MGAT2, which are involved in protein trafficking, display an

180 approximately similar expression levels across most human tissues (Extended Data Fig.9  
181 and Fig. 4c). ERGIC3 and LMAN2 are the components of the endoplasmic  
182 reticulum-Golgi intermediate compartment (ERGIC), which is essential for coronavirus  
183 assembly and budding<sup>36 37</sup>, while LMAN2 and ERGIC1 were recently found to interact  
184 specifically with nonstructural protein Nsp7 and Nsp10 of SARS-CoV-2 respectively<sup>38</sup>.  
185 Whether and how they cooperate during virus life cycle are worth further investigation.  
186 Expression of receptors of the Wnt pathway group is prominent in salivary gland, tongue,  
187 esophagus, and brain (Extended Data Fig.9 and Fig. 4c). Wnt/ $\beta$ -catenin signaling is  
188 critical in taste bud cell renewal and behavioral taste perception<sup>39,40</sup> and KREMEN1/2  
189 plus FUT8 are all negative regulators of this pathway<sup>27,41</sup>. Loss of smell and taste has  
190 frequently been observed in COVID-19 patients<sup>42,43</sup>, suggesting SARS-CoV-2 may act  
191 through these receptors to affect Wnt/ $\beta$ -catenin signaling and therefore taste loss.

192 The affinity-based interactions between SARS-CoV-2 and cellular receptors are key  
193 determinants of virus tropism and pathogenesis. Determining cells or tissues that express  
194 receptors should allow better characterization of the pathway for virus infection and help  
195 understand COVID-19 disease progression. Our genomic receptor profiling of most  
196 human membrane proteins has identified two additional virus entry receptors, ASGR1  
197 and KREMEN1, independent of known ACE2. The combined ASK expression pattern  
198 predicts viral tropism much more closely than any individual entry receptor from cell to  
199 tissue levels. Our results also suggested that SARS-CoV-2 entry into different type of  
200 cells rely on different receptors, and ASK receptors underlie the tropism of SARS-CoV-2.  
201 Notably, ASGR1 and KREMEN1 do not mediate the entry of SARS-CoV, plausibly  
202 explaining the difference of these two viruses in primary infection sites and clinical  
203 manifestations. Unlike ACE2, which only binds to the RBD, ASGR1 and KREMEN1  
204 bind to both the RBD and NTD. NTD is implicated in coronavirus entry<sup>25,26</sup>, and several  
205 neutralizing antibodies from convalescent COVID-19 patients recognizes NTD<sup>23,24</sup>,  
206 suggesting that the domain plays a role during SARS-CoV-2 infection, and that



207 antibodies against the NTD may act through ASGR1 or KREMEN1.

208 The twelve SARS-CoV-2 receptors that bind S protein have diverse binding properties,  
209 functions, and tissue distributions. Integrating this panel of receptors with virological and  
210 clinical data should lead to the identification of infection and pathological mechanisms  
211 and targets. It is plausible that alternative binding receptors exert context-dependent  
212 regulatory effects, leading to differential signaling outcomes, ultimately influencing  
213 infection patterns, immune responses and clinical progression. Our study provides insight  
214 into critical virus-host interactions, tropisms, and pathogenesis of SARS-CoV-2, as well  
215 as potential targets for drug development against COVID-19.

216

## REFERENCES

- 217 1 Zhu, N. *et al.* A Novel Coronavirus from Patients with Pneumonia in China, 2019. *New Engl J*  
218 *Med* **382**, 727-733, doi:10.1056/NEJMoa2001017 (2020).
- 219 2 Huang, C., Wang, Y. & Li, X. Clinical features of patients infected with 2019 novel coronavirus in  
220 Wuhan, China (vol 395, pg 497, 2020). *Lancet* **395**, 496-496,  
221 doi:10.1016/S0140-6736(20)30252-X (2020).
- 222 3 Hoffmann, M. *et al.* SARS-CoV-2 Cell Entry Depends on ACE2 and TMPRSS2 and Is Blocked by  
223 a Clinically Proven Protease Inhibitor. *Cell* **181**, 271-280 e278, doi:10.1016/j.cell.2020.02.052  
224 (2020).
- 225 4 Li, W. H. *et al.* Angiotensin-converting enzyme 2 is a functional receptor for the SARS  
226 coronavirus. *Nature* **426**, 450-454, doi:10.1038/nature02145 (2003).
- 227 5 Zhou, P. *et al.* A pneumonia outbreak associated with a new coronavirus of probable bat origin.  
228 *Nature* **579**, 270+, doi:10.1038/s41586-020-2012-7 (2020).
- 229 6 Puelles, V. G. *et al.* Multiorgan and Renal Tropism of SARS-CoV-2. *N Engl J Med*,  
230 doi:10.1056/NEJMc2011400 (2020).
- 231 7 Gupta, A. *et al.* Extrapulmonary manifestations of COVID-19. *Nat Med* **26**, 1017-1032,  
232 doi:10.1038/s41591-020-0968-3 (2020).
- 233 8 Progress report on the coronavirus pandemic. *Nature* **584**, 325, doi:10.1038/d41586-020-02414-1  
234 (2020).
- 235 9 Schneider-Schaulies, J. Cellular receptors for viruses: links to tropism and pathogenesis. *J Gen*  
236 *Virol* **81**, 1413-1429, doi:10.1099/0022-1317-81-6-1413 (2000).
- 237 10 Milone, M. C. & Fitzgerald-Bocarsly, P. The mannose receptor mediates induction of IFN-alpha in  
238 peripheral blood dendritic cells by enveloped RNA and DNA viruses. *J Immunol* **161**, 2391-2399  
239 (1998).
- 240 11 Tseng, C. T., Perrone, L. A., Zhu, H., Makino, S. & Peters, C. J. Severe acute respiratory syndrome  
241 and the innate immune responses: modulation of effector cell function without productive  
242 infection. *J Immunol* **174**, 7977-7985, doi:10.4049/jimmunol.174.12.7977 (2005).
- 243 12 Tay, M. Z., Poh, C. M., Renia, L., MacAry, P. A. & Ng, L. F. P. The trinity of COVID-19:  
244 immunity, inflammation and intervention. *Nat Rev Immunol* **20**, 363-374,  
245 doi:10.1038/s41577-020-0311-8 (2020).
- 246 13 Hikmet, F. *et al.* The protein expression profile of ACE2 in human tissues. *Mol Syst Biol* **16**, e9610,  
247 doi:10.15252/msb.20209610 (2020).
- 248 14 Sungnak, W. *et al.* SARS-CoV-2 entry factors are highly expressed in nasal epithelial cells  
249 together with innate immune genes. *Nat Med* **26**, 681-687, doi:10.1038/s41591-020-0868-6  
250 (2020).
- 251 15 Lukassen, S. *et al.* SARS-CoV-2 receptor ACE2 and TMPRSS2 are primarily expressed in  
252 bronchial transient secretory cells. *EMBO J* **39**, e105114, doi:10.15252/embj.20105114 (2020).
- 253 16 HinChu. Comparative tropism, replication kinetics, and cell damage profiling of SARS-CoV-2 and  
254 SARS-CoV with implications for clinical manifestations, transmissibility, and laboratory studies of  
255 COVID-19: an observational study. *Lancet Microbe* **1**, e14-23,

- 256 doi:[https://doi.org/10.1016/S2666-5247\(20\)30004-5](https://doi.org/10.1016/S2666-5247(20)30004-5) (2020).
- 257 17 Zou, L. *et al.* SARS-CoV-2 Viral Load in Upper Respiratory Specimens of Infected Patients. *N*  
258 *Engl J Med* **382**, 1177-1179, doi:10.1056/NEJMc2001737 (2020).
- 259 18 Hou, Y. J. *et al.* SARS-CoV-2 Reverse Genetics Reveals a Variable Infection Gradient in the  
260 Respiratory Tract. *Cell* **182**, 429-446 e414, doi:10.1016/j.cell.2020.05.042 (2020).
- 261 19 Deng, M. *et al.* A motif in LILRB2 critical for Angptl2 binding and activation. *Blood* **124**, 924-935,  
262 doi:10.1182/blood-2014-01-549162 (2014).
- 263 20 Zheng, J. *et al.* Inhibitory receptors bind ANGPTLs and support blood stem cells and leukaemia  
264 development. *Nature* **485**, 656-660, doi:10.1038/nature11095 (2012).
- 265 21 Jeffers, S. A. *et al.* CD209L (L-SIGN) is a receptor for severe acute respiratory syndrome  
266 coronavirus. *P Natl Acad Sci USA* **101**, 15748-15753, doi:10.1073/pnas.0403812101 (2004).
- 267 22 Wrapp, D. *et al.* Cryo-EM structure of the 2019-nCoV spike in the prefusion conformation.  
268 *Science* **367**, 1260-1263, doi:10.1126/science.abb2507 (2020).
- 269 23 Liu, L. *et al.* Potent neutralizing antibodies against multiple epitopes on SARS-CoV-2 spike.  
270 *Nature* **584**, 450-456, doi:10.1038/s41586-020-2571-7 (2020).
- 271 24 Chi, X. *et al.* A neutralizing human antibody binds to the N-terminal domain of the Spike protein  
272 of SARS-CoV-2. *Science*, doi:10.1126/science.abc6952 (2020).
- 273 25 Lu, G., Wang, Q. & Gao, G. F. Bat-to-human: spike features determining 'host jump' of  
274 coronaviruses SARS-CoV, MERS-CoV, and beyond. *Trends Microbiol* **23**, 468-478,  
275 doi:10.1016/j.tim.2015.06.003 (2015).
- 276 26 Wang, N. *et al.* Structural Definition of a Neutralization-Sensitive Epitope on the MERS-CoV  
277 S1-NTD. *Cell Rep* **28**, 3395-3405 e3396, doi:10.1016/j.celrep.2019.08.052 (2019).
- 278 27 Mao, B. *et al.* Kremen proteins are Dickkopf receptors that regulate Wnt/beta-catenin signalling.  
279 *Nature* **417**, 664-667, doi:10.1038/nature756 (2002).
- 280 28 Staring, J. *et al.* KREMEN1 Is a Host Entry Receptor for a Major Group of Enteroviruses. *Cell*  
281 *Host Microbe* **23**, 636-643 e635, doi:10.1016/j.chom.2018.03.019 (2018).
- 282 29 Seidah, N. G., Chretien, M. & Mbikay, M. The ever-expanding saga of the proprotein convertases  
283 and their roles in body homeostasis: emphasis on novel proprotein convertase subtilisin kexin  
284 number 9 functions and regulation. *Curr Opin Lipidol* **29**, 144-150,  
285 doi:10.1097/MOL.0000000000000484 (2018).
- 286 30 Saunier, B. *et al.* Role of the asialoglycoprotein receptor in binding and entry of hepatitis C virus  
287 structural proteins in cultured human hepatocytes. *J Virol* **77**, 546-559,  
288 doi:10.1128/jvi.77.1.546-559.2003 (2003).
- 289 31 Chua, R. L. *et al.* COVID-19 severity correlates with airway epithelium-immune cell interactions  
290 identified by single-cell analysis. *Nat Biotechnol*, doi:10.1038/s41587-020-0602-4 (2020).
- 291 32 Xiao, F. *et al.* Evidence for Gastrointestinal Infection of SARS-CoV-2. *Gastroenterology* **158**,  
292 1831-1833 e1833, doi:10.1053/j.gastro.2020.02.055 (2020).
- 293 33 Phipps, M. M. *et al.* Acute Liver Injury in COVID-19: Prevalence and Association with Clinical  
294 Outcomes in a Large US Cohort. *Hepatology*, doi:10.1002/hep.31404 (2020).
- 295 34 Liao, M. *et al.* Single-cell landscape of bronchoalveolar immune cells in patients with COVID-19.  
296 *Nat Med* **26**, 842-844, doi:10.1038/s41591-020-0901-9 (2020).

- 297 35 Zhou, Y. G. *et al.* Pathogenic T-cells and inflammatory monocytes incite inflammatory storms in  
298 severe COVID-19 patients. *Natl Sci Rev* **7**, 998-1002, doi:10.1093/nsr/nwaa041 (2020).
- 299 36 Schoeman, D. & Fielding, B. C. Coronavirus envelope protein: current knowledge. *Viol J* **16**, 69,  
300 doi:10.1186/s12985-019-1182-0 (2019).
- 301 37 Lontok, E., Corse, E. & Machamer, C. E. Intracellular targeting signals contribute to localization  
302 of coronavirus spike proteins near the virus assembly site. *J Virol* **78**, 5913-5922,  
303 doi:10.1128/JVI.78.11.5913-5922.2004 (2004).
- 304 38 Gordon, D. E. *et al.* A SARS-CoV-2 protein interaction map reveals targets for drug repurposing.  
305 *Nature* **583**, 459-468, doi:10.1038/s41586-020-2286-9 (2020).
- 306 39 Gaillard, D. *et al.* beta-catenin is required for taste bud cell renewal and behavioral taste  
307 perception in adult mice. *PLoS Genet* **13**, e1006990, doi:10.1371/journal.pgen.1006990 (2017).
- 308 40 Liu, F. *et al.* Wnt-beta-catenin signaling initiates taste papilla development. *Nat Genet* **39**, 106-112,  
309 doi:10.1038/ng1932 (2007).
- 310 41 Kurimoto, A. *et al.* The absence of core fucose up-regulates GnT-III and Wnt target genes: a  
311 possible mechanism for an adaptive response in terms of glycan function. *J Biol Chem* **289**,  
312 11704-11714, doi:10.1074/jbc.M113.502542 (2014).
- 313 42 Menni, C. *et al.* Real-time tracking of self-reported symptoms to predict potential COVID-19. *Nat*  
314 *Med* **26**, 1037-1040, doi:10.1038/s41591-020-0916-2 (2020).
- 315 43 Xydakis, M. S. *et al.* Smell and taste dysfunction in patients with COVID-19. *Lancet Infect Dis*,  
316 doi:10.1016/S1473-3099(20)30293-0 (2020).

317

318

## FIGURES

319

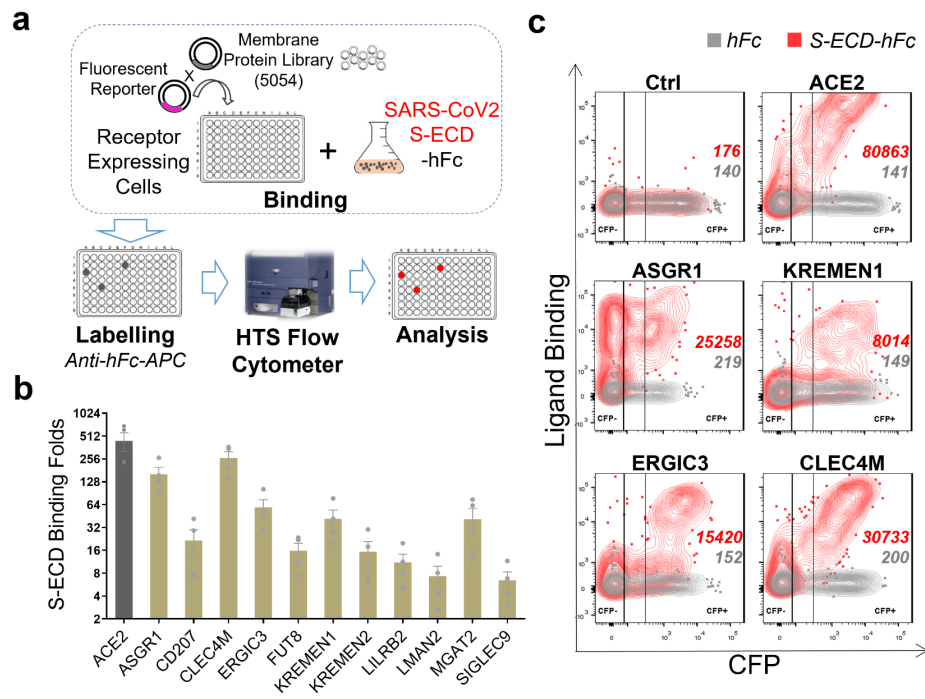

320

321

### Figure 1: Genomic receptor profiling identifies twelve SARS-CoV-2 S binding

322

receptors. **a**, Scheme of genomic receptor profiling. Plasmids encoding 5054 human

323

membrane proteins were individually co-transfected with a CFP reporter into 293e cells.

324

Cells were incubated with SARS-CoV-2 S-ECD-hFc protein, labelled using

325

anti-hFc-APC antibody, binding was measured by flow cytometry. **b**, SIP identified S

326

binding receptors. Relative binding of receptors with S-ECD-hFc compared to that with

327

hFc control in CFP<sup>+</sup> cells were shown. **c**, Representative flow dot plot showing the

328

binding of S-ECD with top-ranking receptors.

329

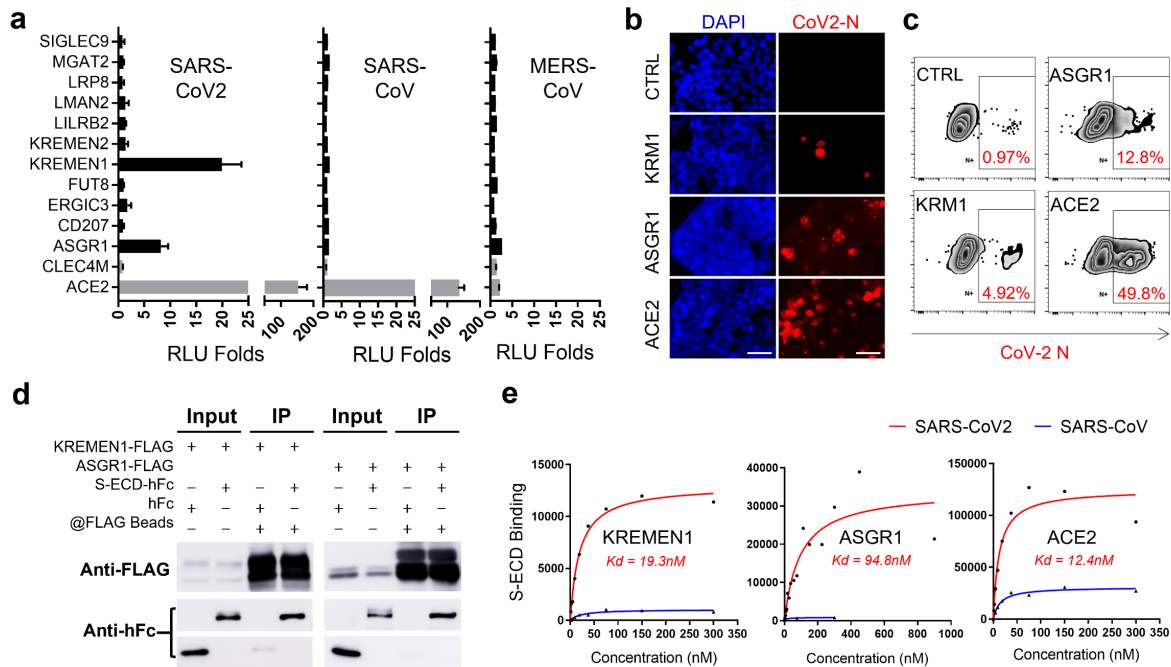

330

331

332

333

334

335

336

337

338

339

340

341

342

343

344

**Figure 2. KREMEN1 and ASGR1 directly mediate SARS-CoV-2 entry.** **a**, SIP-identified S-binding receptors were ectopically expressed in ACE2-KO 293T cells individually, followed by infection with pseudotyped SARS-CoV-2, SARS-CoV, and MERS-CoV separately. Luciferase activities relative to that of empty vector transfected cells were measured 60 hrs post infection. Data are presented as mean  $\pm$  s.d (n=3). **b and c**, KREMEN1, ASGR1, or ACE2 transfected ACE2-KO 293T cells were infected with authentic SARS-CoV-2, and immune- fluorescence (B) or flow cytometry (C) were performed with antibody against the N protein of SARS-CoV-2 72hr post infection. Bar = 50 $\mu$ m. **d**, Co-immuno- precipitation was used to detect the interaction of S-ECD with full length KREMEN1 or ASGR1. **e**, KREMEN1, ASGR1 or ACE2 expressing 293e cells were incubated with different concentrations of S-ECD-hFc of SARS-CoV2 or SARS-CoV, separately, and S-ECD binding was monitored by flow cytometry to determine Kd.

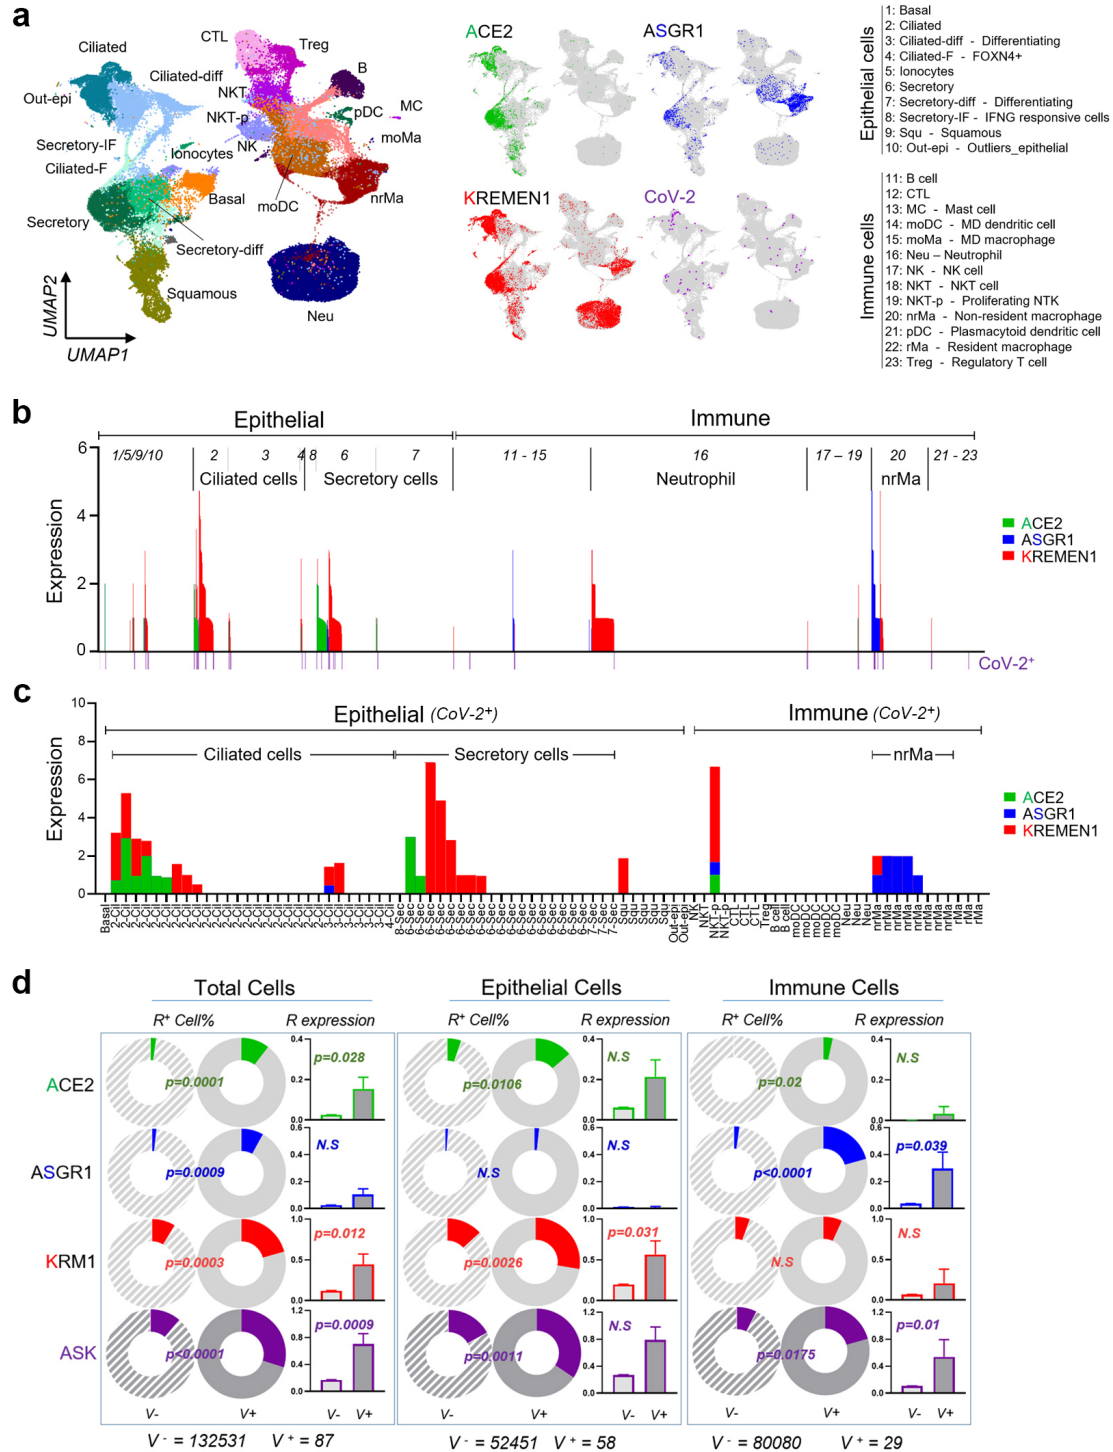

345

346

347

348

**Figure 3. ASK entry receptors correlate significantly with SARS-CoV-2 susceptibility in the upper respiratory tract. a**, Distribution of ACE2, ASGR1, KREMEN1 and SARS-CoV-2 in different cell populations of the upper airway. **b**,

349 Overlapping map of ASK expression levels and virus infection pattern in different cell  
350 populations. **c**, ASK expression pattern in SARS-CoV-2 positive cells. **d**, Correlations of  
351 virus susceptibility with ASK receptors individually or in combination based on receptor  
352 positive cell percentage and receptor expression level.

353



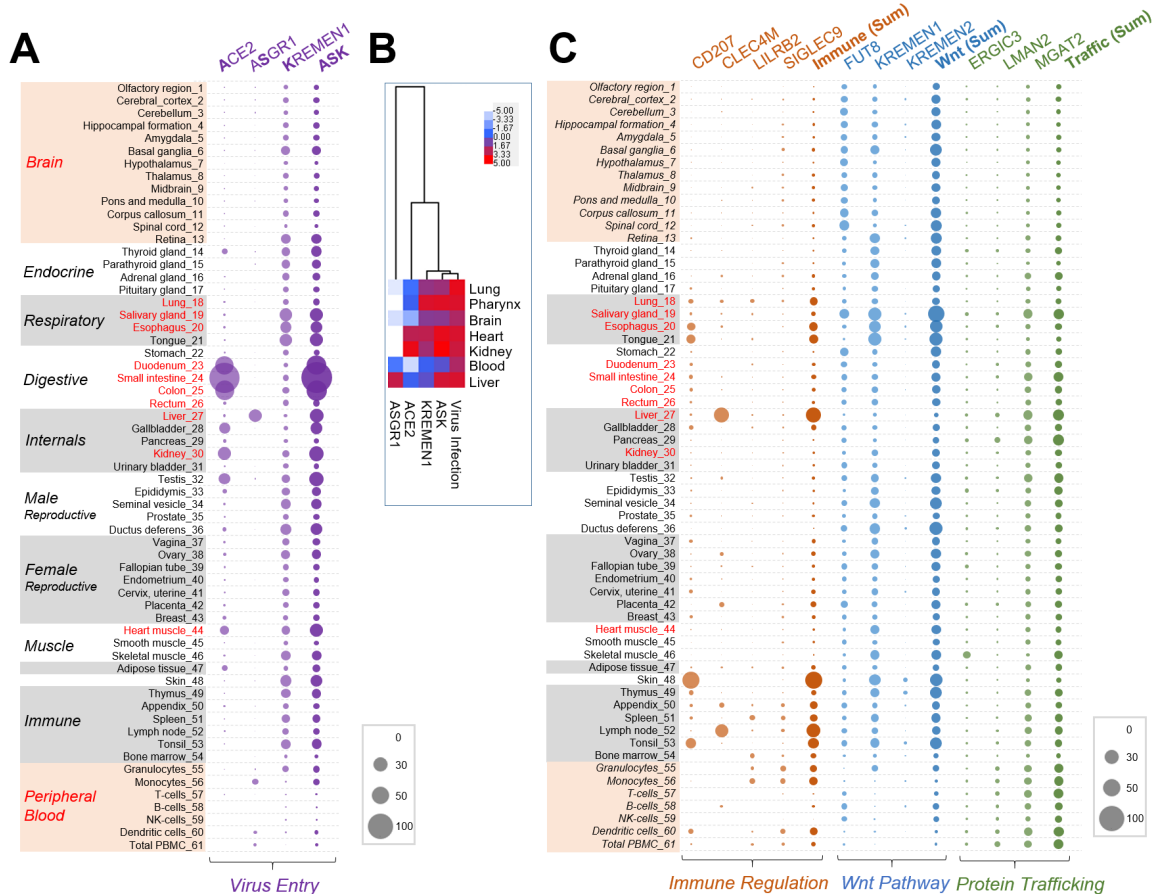

354

355

356

357

358

359

360

361

362

363

364

365

366

**Figure 4. Systemic modeling of SARS-CoV-2 interactions within human tissues.** The mRNA expression levels of each receptor in human tissues were derived from the human protein Atlas. Receptor-mediated SARS-CoV-2 binding potentials in each tissue were calculated by dividing receptor expression level with its affinity for S protein (Kd). **a**, Virus binding potentials of each tissue contributed by “entry group” ASK receptors. **b**, Virus infection rates (number of virus positive samples) in the indicated tissues were derived from a recent biopsy study <sup>6</sup>, and these were clustered with ASK receptor-mediated virus binding potentials. **c**, Virus binding potentials of each tissue contributed by the S-binding receptors involved in immune regulation, the Wnt pathway and protein trafficking individually or in combination. In **a** and **c**, tissues or organs that were identified as positive to SARS-CoV-2 are labeled red.

367 **Table 1: Characteristics of the interaction between receptors and SARS-CoV-2 S**  
 368 **protein**

| Gene Symbol | ACCN         | MP Type | Kd Measurement |           | Relative Binding Folds |             |     |
|-------------|--------------|---------|----------------|-----------|------------------------|-------------|-----|
|             |              |         | Kd (nM)        | Std.Error | NTD                    | RBD         | S2  |
| ACE2        | NM 021804    | I       | 12.4           | 3.8       |                        | <b>493</b>  |     |
| ASGR1       | NM 001671    | II      | 94.8           | 31.1      | 38.9                   | <b>410</b>  |     |
| CD207       | NM 015717    | II      | 13.2           | 2.8       | <b>8.9</b>             |             |     |
| CLEC4M      | NM 014257    | II      | 16.0           | 3.3       | <b>63.6</b>            | 7.9         | 4.9 |
| ERGIC3      | NM 198398    | Multi   | 525.4          | 40.5      | <b>16.4</b>            |             |     |
| FUT8        | NM 004480    | II      | 34.9           | 7.9       | <b>11.9</b>            |             | 2.7 |
| KREMEN1     | NM 001039571 | I       | 19.3           | 7.7       | 4.2                    | <b>37.5</b> | 5.5 |
| KREMEN2     | NM 172229    | I       | 60.0           | 14.2      |                        | <b>14.0</b> |     |
| LILRB2      | NM 001080978 | I       | 106.2          | 28.1      | 2.5                    | <b>24.3</b> | 2.3 |
| LMAN2       | NM 006816    | I       | 355.1          | 46.8      |                        |             |     |
| MGAT2       | NM 002408    | II      | 36.3           | 4.3       | <b>8.4</b>             |             | 4.1 |
| SIGLEC9     | NM 014441    | I       | 116.5          | 30.9      | 3.0                    | <b>5.0</b>  |     |

369 ACCN, Accession Number; MP Type, Membrane Protein Type.

370

## 371 **METHODS**

### 372 **Ethics statement**

373 All procedures in this study regarding authentic SARS-CoV-2 virus were performed in  
374 biosafety level 3 (BSL-3) facility, Medical School of Fudan University.

### 375 **Cell culture and transfection**

376 Vero E6 cells and HEK293T cells were cultured in DMEM supplemented with 10% FBS  
377 at 37°C in 5% CO<sub>2</sub> and the normal level of O<sub>2</sub>. HEK293e cells were cultured in  
378 serum-free FreeStyle 293 Medium (Invitrogen) with 120 rpm rotation at 37°C in 5% CO<sub>2</sub>  
379 and the normal level of O<sub>2</sub>. For transient overexpression in 293T and 293e, plasmids were  
380 transfected using Lipofectamine 2000 (Invitrogen) according to the manufacture provided  
381 protocol.

### 382 **Genomic receptor profiling**

383 To prepare SARS-CoV-2 S-ECD-hFc or control hFc containing condition medium,  
384 pCMV-S-ECD-hFc or pCMV-secreted-hFc plasmid was transfected into 293e cells, and  
385 condition medium was collected 4 days post transfection and filtered with 0.45um filter  
386 for screening. To prepare receptor expressing cells, plasmids encoding 5054 human  
387 membrane protein were individually co-transfected with CFP reporter vector (5:1) into  
388 293e cells in 96 deep-well-plate. 2-5x10<sup>4</sup> membrane protein expressing cells per well  
389 were collected 48hrs after transfection, washed once with PBS/2%FBS and incubated  
390 with 1ml SARS-CoV-2 S-ECD or hFc control condition medium for 1hr on ice.  
391 Supernatant was discarded after centrifugation and washed once with PBS/2%FBS, the  
392 cells were then labelled with Anti-hFc-APC (Jackson Lab) antibody for 20min, and  
393 washed once with PBS/2%FBS. The binding of S-ECD to the cells were measured by  
394 HTS flow cytometry (BD CantoII). The flow data were analyzed with FlowJo software.  
395 Relative binding of receptor (CFP<sup>+</sup> cells) to S-ECD-hFc compared with that to hFc  
396 control were measured.

### 397 **Co-IP and Kd measurement**

398 Receptor expressing cells were lysed with RIPA buffer (Sigma) and centrifuged for  
399 15min at 15000rpm at 4°C, the cell lysate were collected. Purified hFc-tagged S-ECD  
400 proteins (final concentration of 10ug/ml) were added into cell lysate together with  
401 anti-FLAG beads, and incubated at 4°C for overnight. Beads were washed three times  
402 with the RIPA buffer, and the samples were prepared for western blot with anti-hFc or  
403 anti-FLAG antibodies. For Kd measurement, receptor coding plasmid was co-transfected  
404 with CFP reporter vector (5:1) into 293e cells. Cells were collected 48hr after transfection.  
405 ~10<sup>4</sup> cells per well were used for binding with series diluted purified S-ECD-hFc proteins  
406 as described in the experiment of Secretome Interaction Profiling. The flow data were  
407 analyzed with FlowJo software. Ligand binding value at each ligand concentration was  
408 normalized by equation of  $[(APC-MFI \text{ of } CFP^+) - (APC-MFI \text{ of } CFP^-)] - [(APC-MFI \text{ of } CFP^+) - (APC-MFI \text{ of } CFP^-)]_{\text{zero ligand concentration}}$ . Kd and Bmax (maximum binding value)  
409 were calculated with Prism8 software.  
410

### 411 **Protein purification and western blot**

412 For purification of SARS-CoV-2 S-ECD-hFc, RBD-hFc, NTD-hFc, S2-hFc and  
413 SARS-CoV S-ECD, the plasmids were transfected into 293e cells, and condition medium  
414 was collected 4 days post transfection and filtered with 0.45um filter. hFc tagged proteins  
415 were purified using Protein A affinity column and then desalted to PBS solution with  
416 AKTA purifier system. Proteins were concentrated by 10KDa cutoff spin column  
417 (Amicon). For western blot, samples was separated by SDS-PAGE gel and transferred to  
418 nitrocellulose membrane. The membrane was labeled with the primary antibody and then  
419 HRP-conjugated secondary antibody at suggested concentration, and detected by ECL kit  
420 (Beyotime).

### 421 **ACE2 knockout 293T stable cell line**

422 ACE2 small guide RNA was constructed into pSLQ1651 (Addgene #51024) (44) with a

423 targeting sequence of CTTGGCCTGTTCTCAATGGTGG. ACE2 sgRNA plasmid or  
424 Cas9Bsd plasmid (Addgene #68343) (45) were co-transfected with psPAX2 and pMD2G  
425 plasmids into 293T cells by Lipofectamine 2000 (Invitrogen) according to the  
426 manufacture provided protocol. Lentivirus were collected 72hr post transfection to infect  
427 293T cells. ACE2 KO 293T stable cell line were obtained by single cell dilution.

### 428 **Pseudotyped coronavirus packaging and infection**

429 For pseudotyped SARS-CoV-2, SARS-CoV and MERS-CoV, S protein encoding  
430 pCDNA3.1 plasmids were mixed with pNL4-3.Luc.R vector separately with a ratio of 1:1,  
431 and transfected into 293T cells using Lipofectamine 2000. Virus-containing supernatant  
432 was collected 48-72 hours post-transfection and filtered through 0.45um PES membrane  
433 filter (Millipore). For infection, cells were seeded into 96 well plate with  $\sim 2 \times 10^4$  cells per  
434 well, 50ul virus-containing supernatant per well was added. Luciferase activities were  
435 measured 48hr post infection with Bright-Lumi™ Firefly Luciferase Reporter Gene  
436 Assay Kit (Beyotime, RG051M) and multifunctional microplate reader (TECAN 200pro).

### 437 **Authentic SARS-CoV-2 generation and infection**

438 SARS-CoV-2/MT020880.1 were expanded in Vero E6 cells. Cells were collected 50hr  
439 post-infection and lysed by freeze-thaw method. Virus containing supernatants were  
440 collected by centrifugation at  $\sim 2500 \times g$  for 10 minutes, and aliquot and stored at  $-80^\circ\text{C}$ .  
441 For infection, targeted cells were incubated with fresh medium diluted virus supernatant  
442 at MOI of 0.1 for 48hrs. SARS-CoV-2 replication was examined by  
443 immuno-fluorescence and flow cytometry with anti SARS-CoV-2 N protein antibody.

### 444 **Data analysis and statistics**

445 Gene Ontology Enrichment Analysis was performed by R bioconductor. For host-virus  
446 interaction map, receptor expression in each tissues were obtained from human Protein  
447 Atlas (<https://www.proteinatlas.org/>). mRNA expression level was normalized by  
448 dividing the expression level with the Kd of each receptor. Virus infection rates of tissues

449 were obtained from the study published by Puelles et al. Cluster was performed with R  
450 package. For single cell sequencing (scRNA-seq) profile of the upper airway tract with  
451 COVID-19, the count, viral load and metadata are obtained from Magellan COVID-19  
452 data explorer at <https://digital.bihealth.org>. Chi-square test and student's t-test were  
453 performed to compare receptor percentage and receptor expression value in different cell  
454 populations respectively. All tests were two sided. P value <0.05 was designated  
455 significance.

#### 456 **Reporting Summary:**

457 Further information on research design is available in the Nature Research Reporting  
458 Summary linked to this paper.

#### 459 **Data availability:**

460 Receptor expression levels in each tissues were obtained from human Protein Atlas  
461 (<https://www.proteinatlas.org/>). Single cell sequencing (scRNA-seq) profile of the upper  
462 airway tract with COVID-19 and the metadata were obtained from Magellan COVID-19  
463 data explorer at <https://digital.bihealth.org>. All data supporting the findings of this study  
464 are available within the paper or in the extended data.

#### 465 **Methods References**

- 466 44. Tzelepis, K. *et al.* A CRISPR Dropout Screen Identifies Genetic Vulnerabilities and Therapeutic  
467 Targets in Acute Myeloid Leukemia. *Cell Rep* 17, 1193-1205 (2016).
- 468 45. Chen, B. *et al.* Dynamic imaging of genomic loci in living human cells by an optimized CRISPR/Cas  
469 system. *Cell* 155, 1479-1491 (2013).

470

471 **ACKNOWLEDGEMENTS**

472 We thank Guy Riddihough of Life Science Editors for manuscript discussion and  
473 revision, and the staff in the Biosafety Level 3 Laboratory of Fudan University for  
474 experiments helping. This study was funded by the National Natural Science Foundation  
475 of China (projects 81873438 to Z.L., 81873922 to M.L.).

476 **AUTHOR CONTRIBUTIONS**

477 Z.L., M.L., Y.X., and G.X. conceived the project. Y.G., X.Z. and J.C with the help from  
478 J.Z., X.J., J.W., J.Y., X.Z., W.Y., Y.Z., performed receptor profiling, characterizing  
479 receptor-ligand interaction. M.L. H.G. and Y.W. performed virus related experiments with  
480 the help from G.S., X.J., F.L.. Z.L., M.L., J.W. Y.G., J.C. H.G. and Y.W. performed  
481 bioinformatics analysis and analyzed the data. Z.L., M.L., Y.X., G.X. and Y.Z. wrote the  
482 manuscript.

483 **COMPETING INTERESTS**

484 M.L., Z.L., Y.Z. H.G. and Y.X. are listed as inventors on a pending patent application  
485 for the newly identified S receptors described in this manuscript. The other authors  
486 declare no competing interests.

## EXTENDED DATA FIGURES

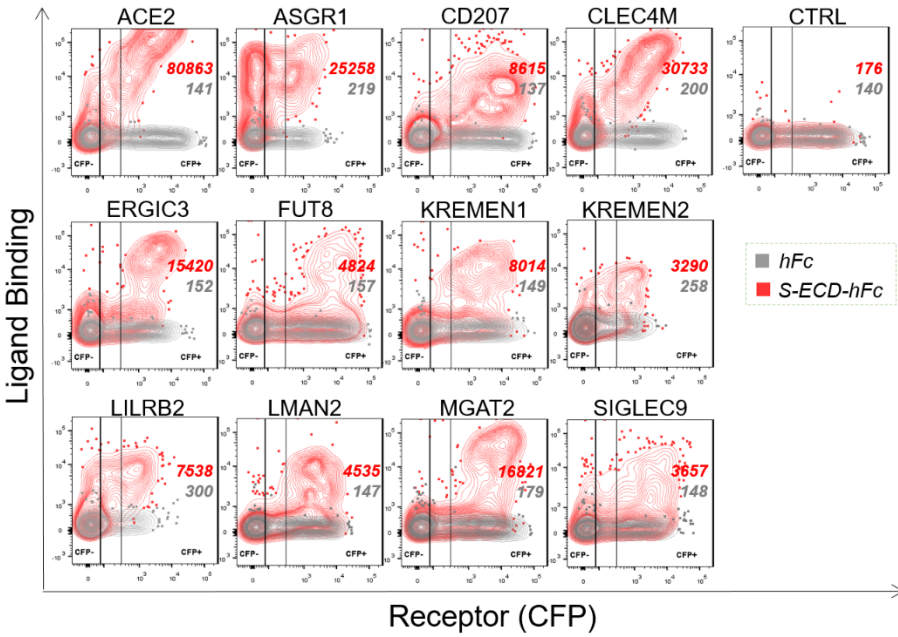

**Extended Data Fig. 1 | Binding of S-ECD with the profiling identified receptors.** Plasmids encoding the indicated receptors were individually co-transfected with CFP reporter into 293e cells. The cells were incubated with SARS-CoV-2 S-ECD-hFc protein or hFc control protein, and then labelled by Anti-hFc-APC antibody, binding were measured by flow cytometry. Binding of S-ECD or hFc control to receptor were shown (Mean Fluorescent Intensity (MFI) of APC fluorescence).



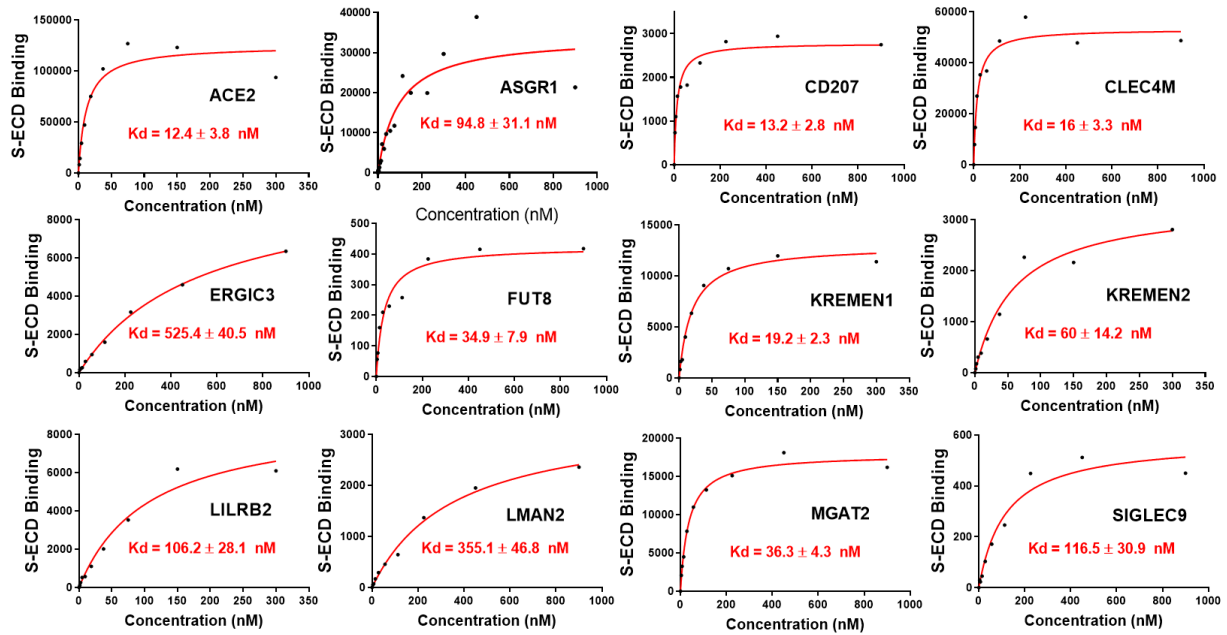

**Extended Data Fig. 2 |  $K_d$  measurement of the interaction of SARS-CoV-2 S-ECD with its receptors.** 293e cells expressing the indicated receptors were incubated with serially diluted concentrations of SARS-CoV2 S-ECD-hFc, S-ECD binding were determined by flow cytometry for  $K_d$  measurement.

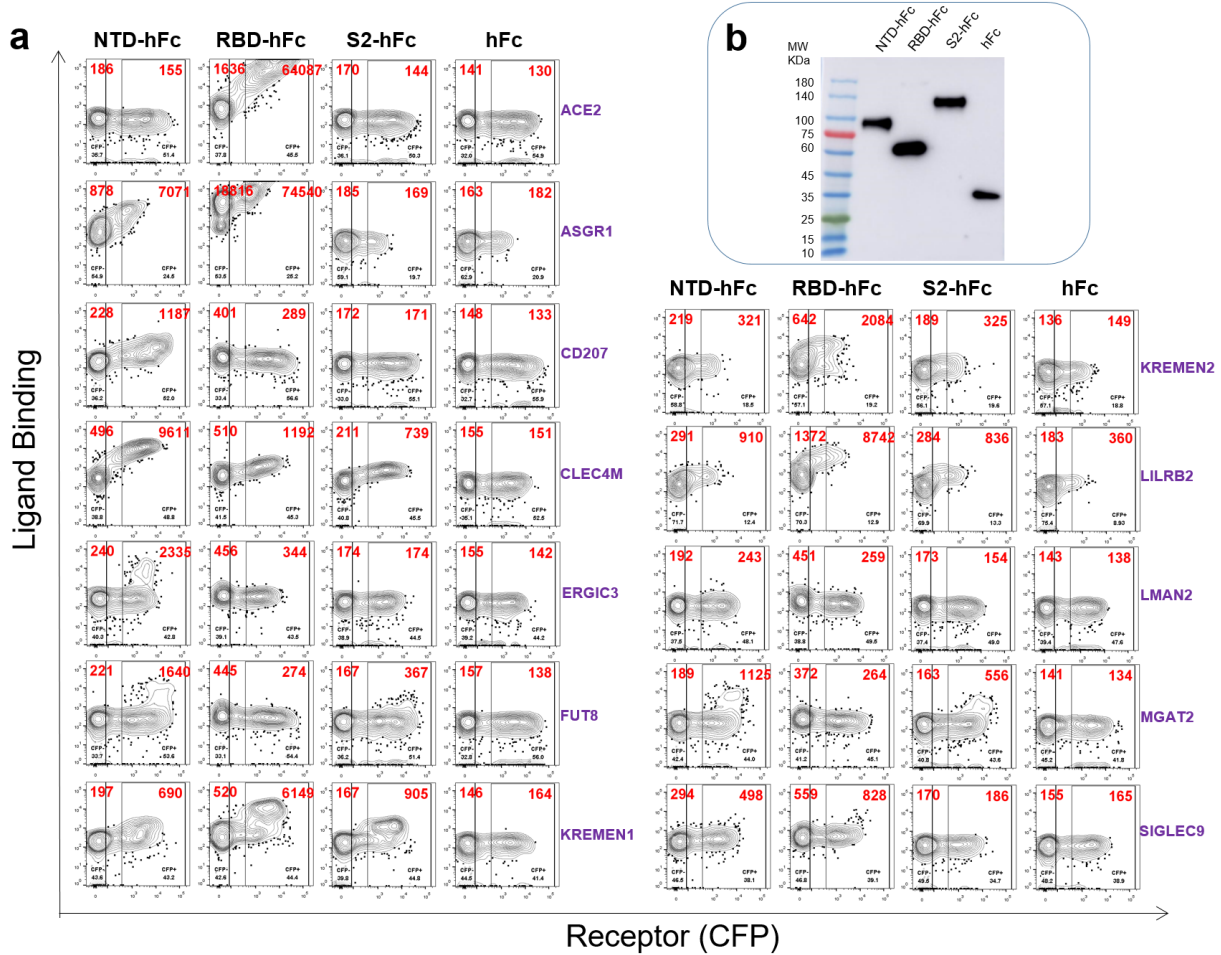

**Extended Data Fig. 3 | Analysis of binding domain on SARS-CoV-2 S protein. a**, 293e cells expressing the indicated receptors were incubated with NTD-hFc, RBD-hFc, S2-hFc or hFc control separately. Binding were measured by flow cytometry. **b**, Western blot with anti-hFc antibody showing the ligand proteins used in this assay.

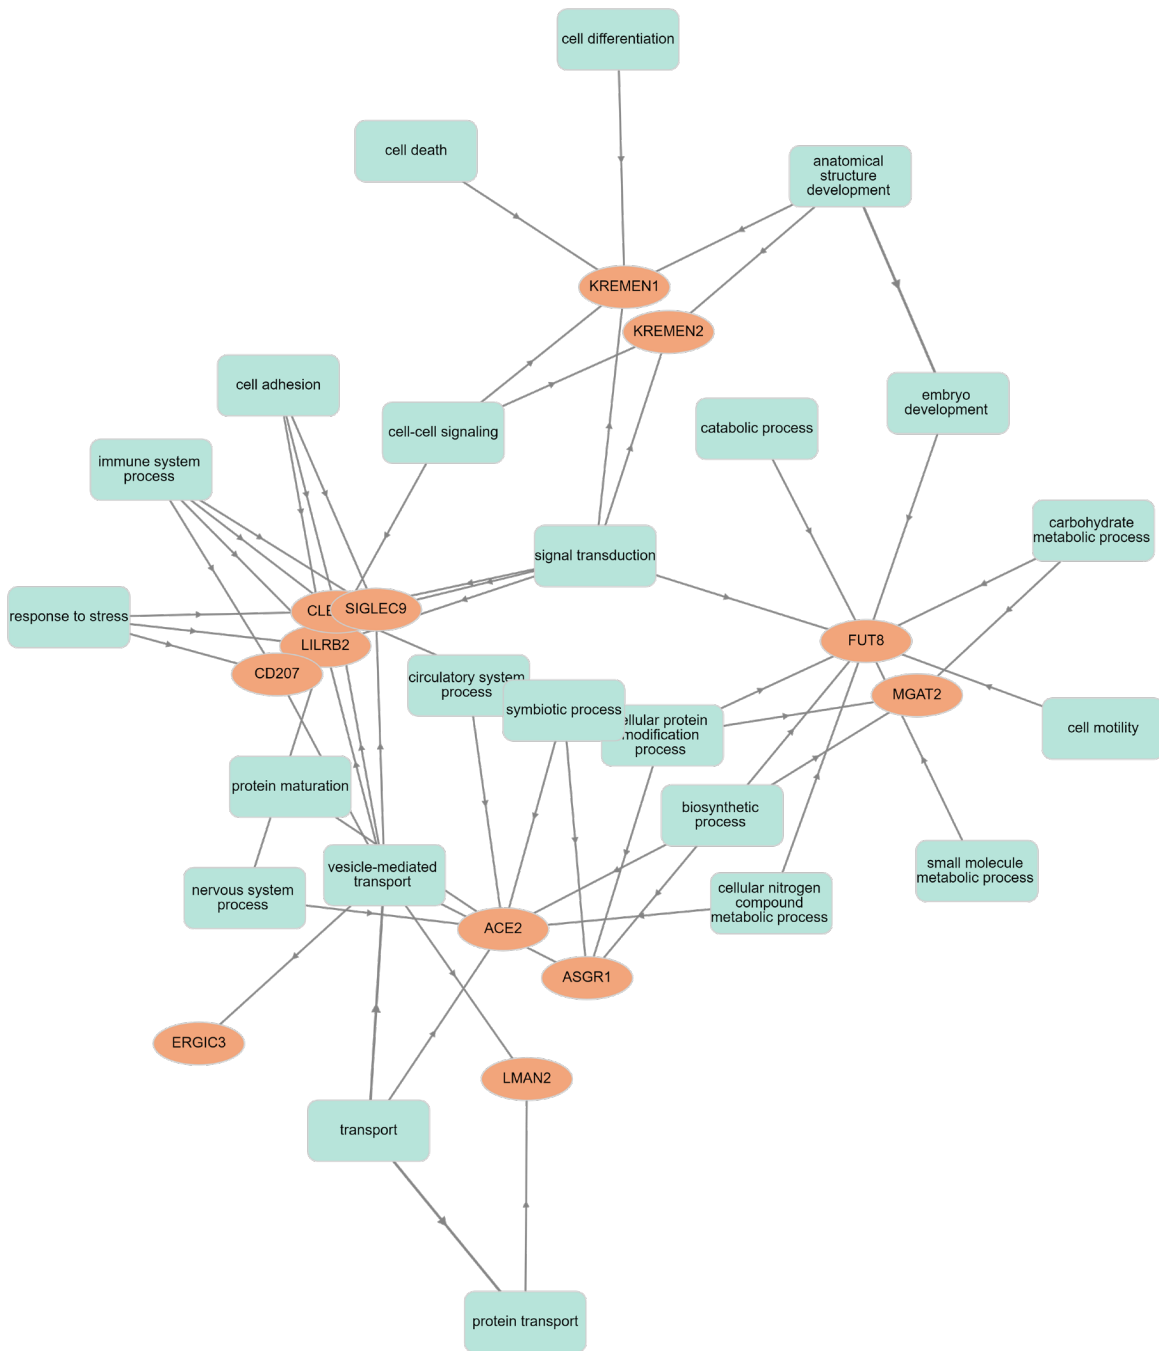

**Extended Data Fig. 4 | Biological function network of twelve SARS-CoV-2 S receptors.**

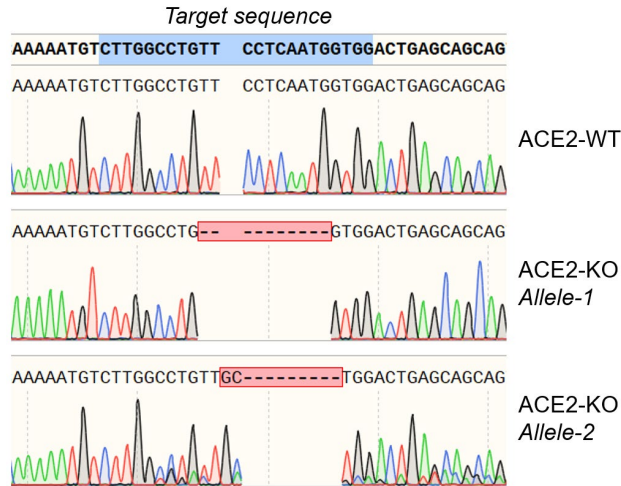

**Extended Data Fig. 5 | Genotyping of ACE2 KO 293T cell line.** ACE2 exon1 was PCR amplified from ACE2-WT/KO 293T cells for sequencing. Gene editing at ACE2 locus on both alleles were shown. Both editing result in frame-shift of ACE2.

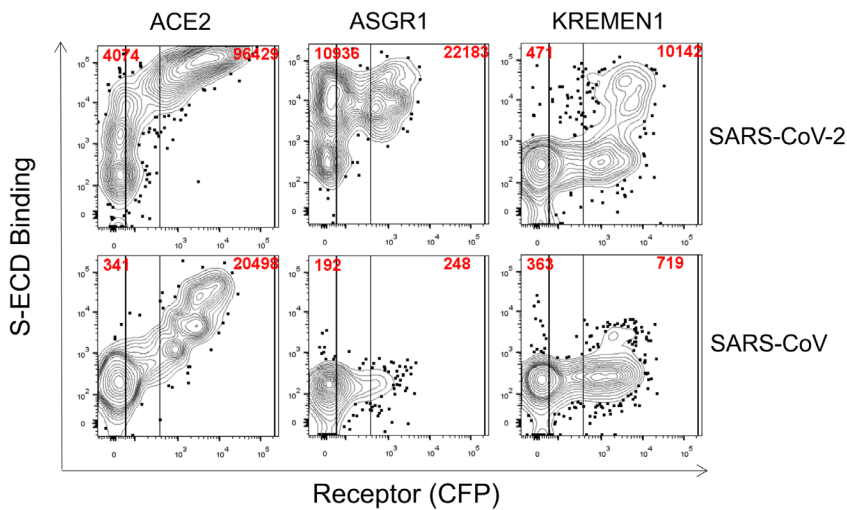

**Extended Data Fig. 6 | Binding of KREMEN1, ASGR1 and ACE2 with the S-ECD of SARS-CoV and SARS-CoV-2.** KREMEN1, ASGR1 or ACE2 expressed 293e cells were incubated with S-ECD-hFc (10 $\mu$ g/ml final concentration) of SARS-CoV2 or SARS-CoV separately. S-ECD binding were measured by flow cytometry.

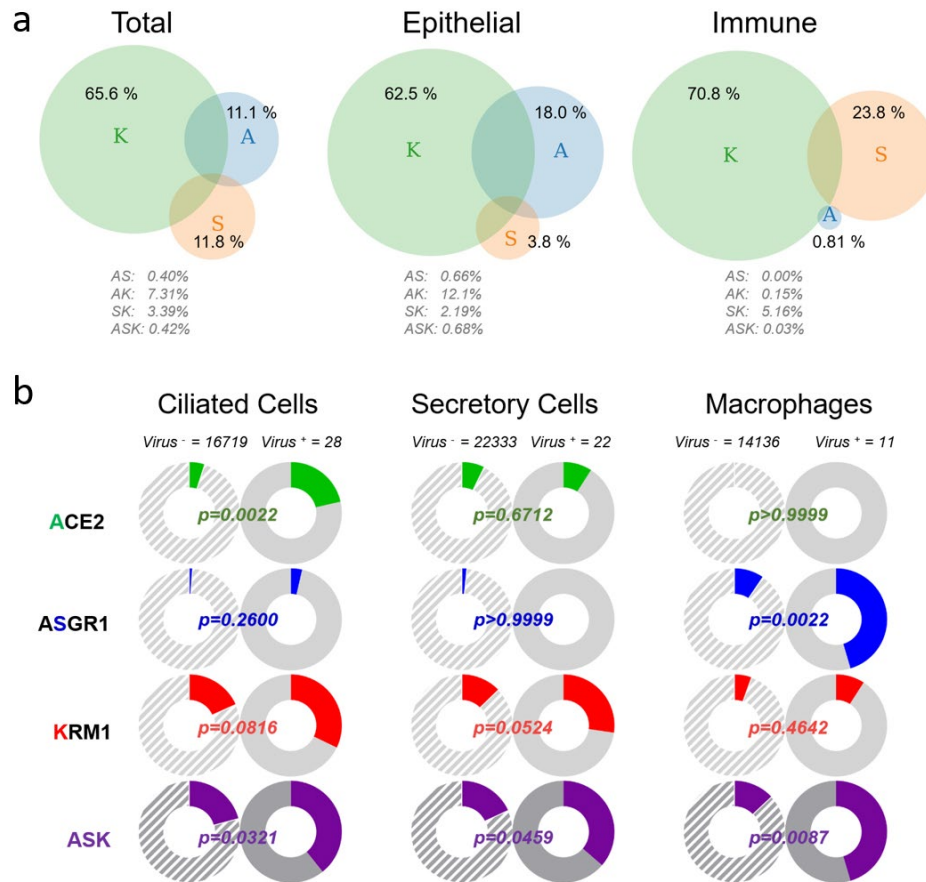

**Extended Data Fig. 7 | Distribution of ACE2, ASGR1 and KREMEN1 in ASK receptor positive cells and receptors correlation with virus susceptibility in the upper respiratory tract of patients with COVID-19.** **a**, In ASK (ACE2/ASGR1/KREMEN1) receptor positive cells of total population, or epithelial and immune subpopulations of the upper respiratory tract with COVID-19, percentage of cells that expressing the indicated receptor(s) only were shown as venn diagram. **b**, In the epithelial ciliated and secretory cells, and immune macrophages of the upper respiratory tract with COVID-19, correlations of virus susceptibility with ASK receptors individually or in combination based on receptor positive cell percentage were determined. Virus positive and negative cell numbers were shown. p Values were calculated by Chi-square test.

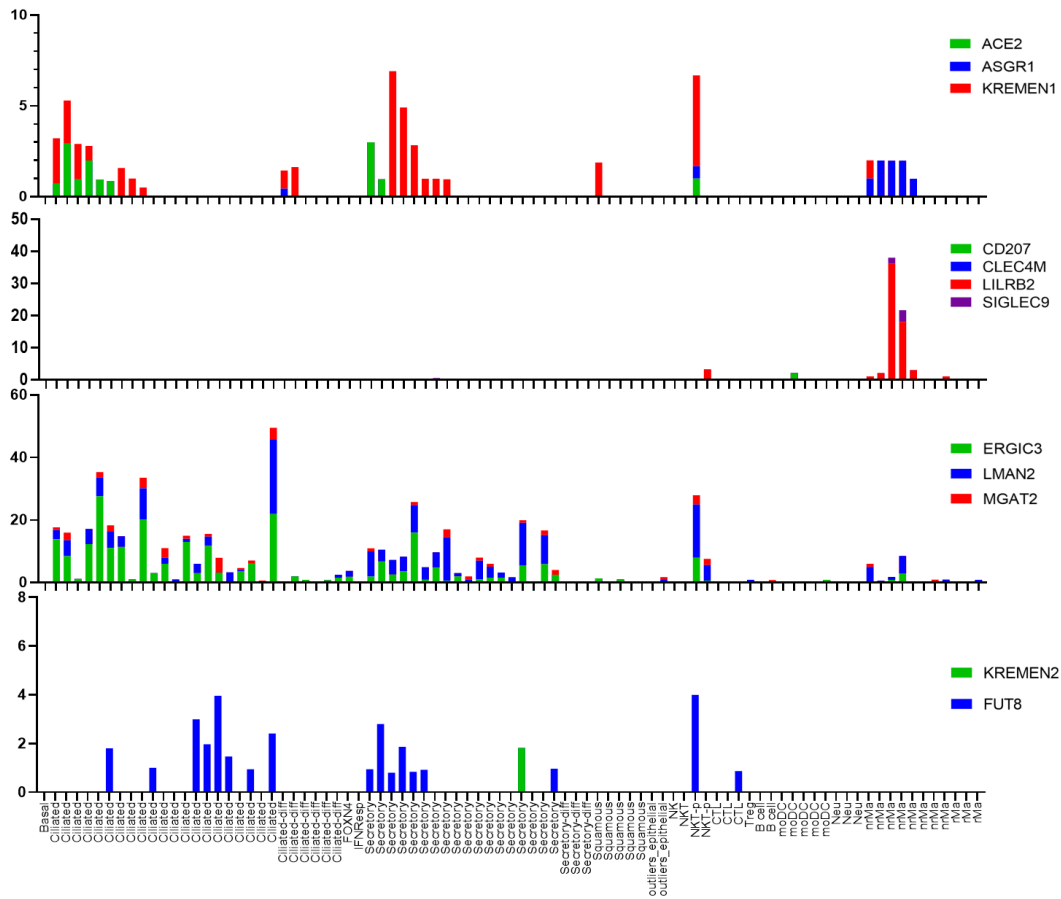

**Extended Data Fig. 8 | Expression of the twelve S receptors in SARS-CoV-2 positive cells from the upper respiratory tract with COVID-19.**

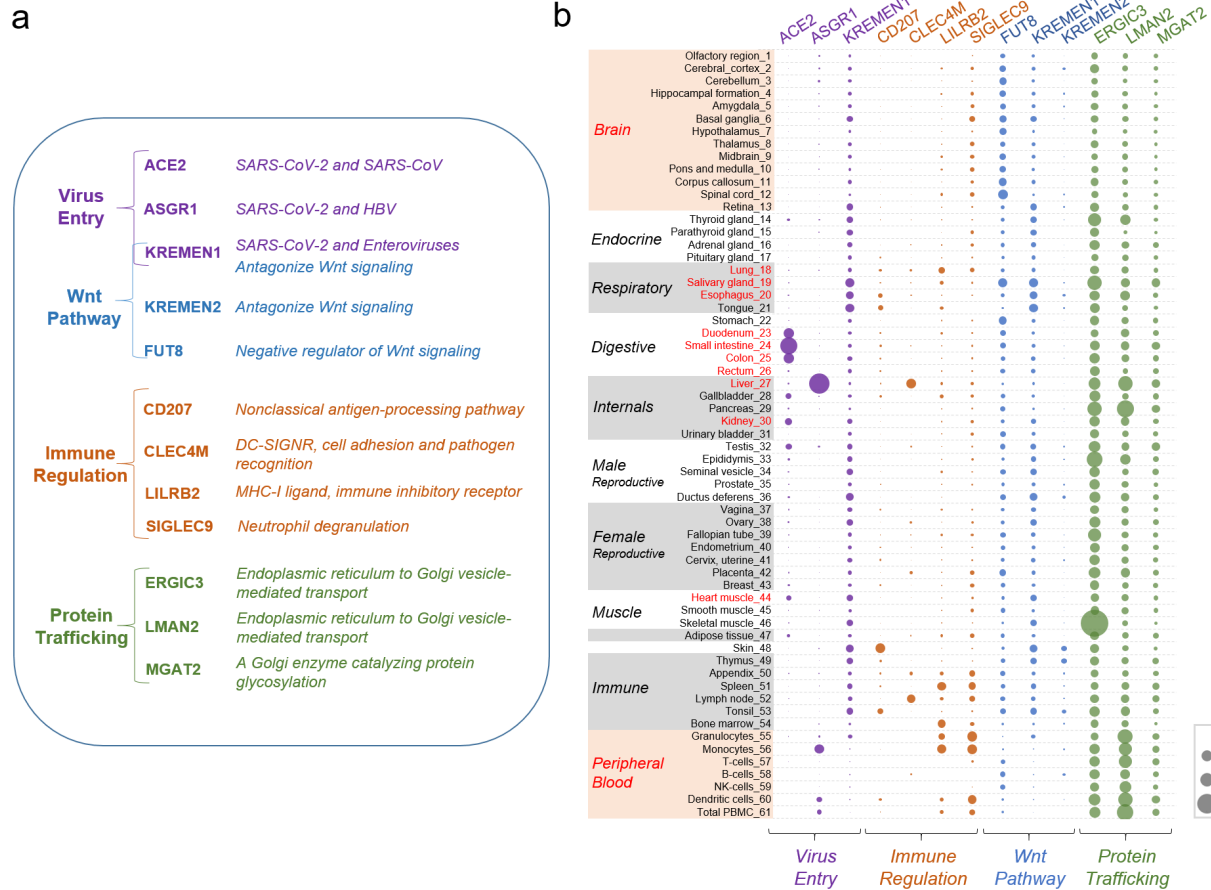

**Extended Data Fig. 9 | Expression pattern of SARS-CoV-2 receptors across human tissues.**  
**a**, S receptors were classified according to their functions in virus entry, immune regulation, the Wnt pathway, and protein trafficking. **b**, Expression pattern of SARS-CoV-2 receptors across human tissues. mRNA expression levels of each receptor in human tissues were obtained from human protein Atlas. Tissues or organs that were identified as positive to SARS-CoV-2 are labeled red.

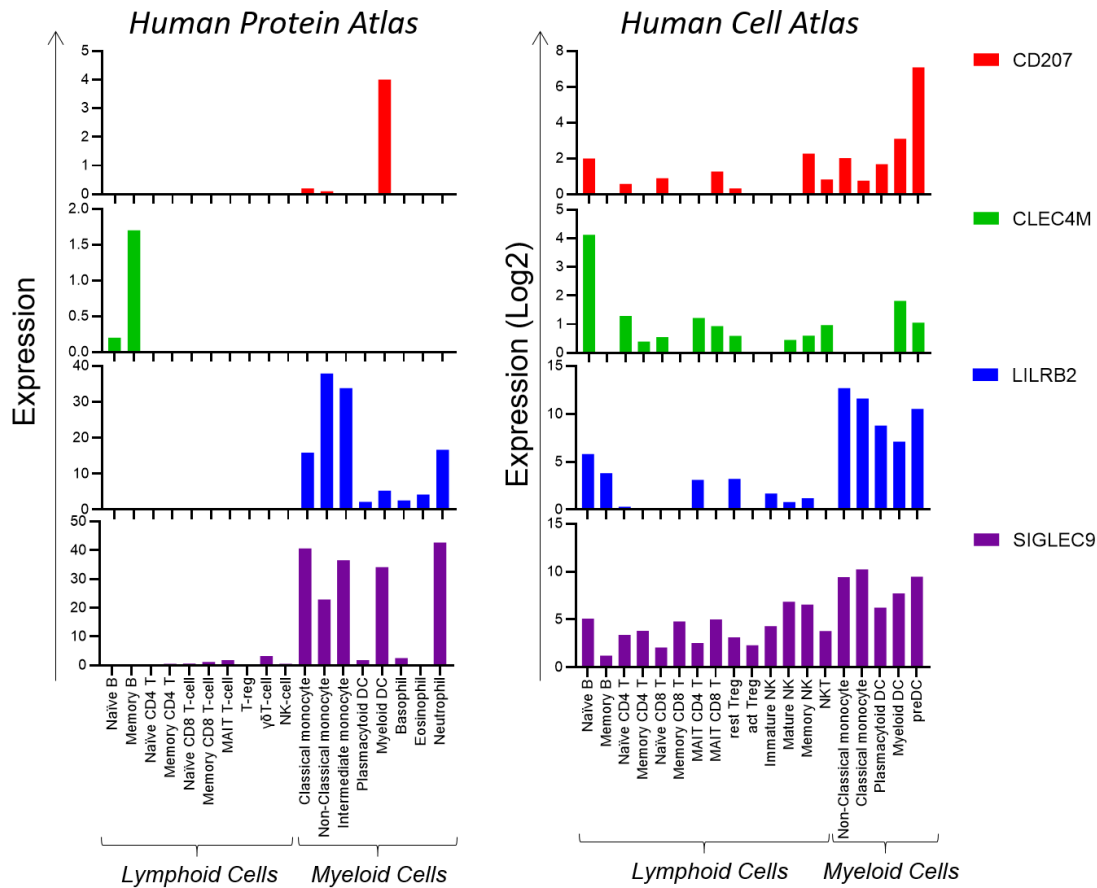

**Extended Data Fig. 10 | Expression pattern of CD207, CLEC4M, LILRB2 and SIGLEC9 in different cell populations of PBMCs.** mRNA expression levels of indicated receptors in different cell population of PBMCs were derived from human Protein Atlas (<https://www.proteinatlas.org/>) and human Cell Atlas (<http://immunecellatlas.net/>) and shown as bar plot.
